# Supplementary material for: Dysfunctional self-talk associated with eating disorder severity and symptomatology
Source: Springer Nature journal article supplement (doi:10.1186/2050-2974-2-14), 2014-05-27
Supplement: 40337_2014_139_MOESM1_ESM.pdf [file 40337_2014_139_MOESM1_ESM.pdf]

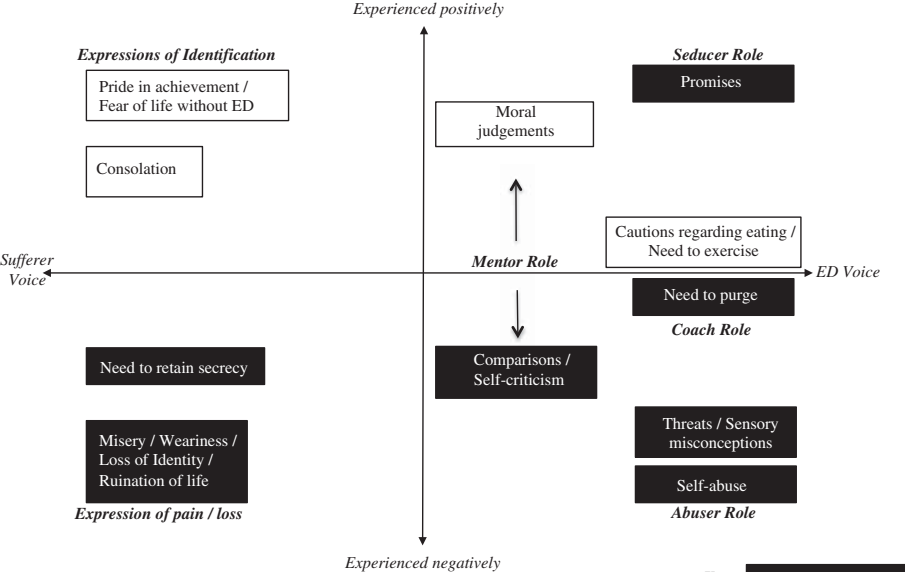

**Key:**

- Loads on Component 1
- Loads on Component 2
